# Supplementary material for: Effects of Hypothermia vs Normothermia on Societal Participation and Cognitive Function at 6 Months in Survivors After Out-of-Hospital Cardiac Arrest: A Predefined Analysis of the TTM2 Randomized Clinical Trial
Source: PubMed Central journal article supplement (PMC10407762; doi:10.1001/jamaneurol.2023.2536), 2023-08-07
Supplement: jamaneurol-e232536-s001.pdf [file jamaneurol-e232536-s001.pdf]

## Supplemental Online Content

1  
2  
3  
4  
5  
6  
7  
8  
9  
10  
11  
12  
13  
14  
15  
16  
17  
18  
19  
20  
21  
22  
23  
24  
25  
26  
27  
28  
29  
30  
31  
32  
33  
34

Lilja G, Ullén S, Dankiewicz J, et al. The effects of hypothermia vs normothermia on societal participation and cognitive function at 6 months in survivors after out-of-hospital cardiac arrest: a predefined analysis of the randomized clinical TTM2 randomized clinical trial. *JAMA Neurol*. Published online August 7, 2023. doi:10.1001/jamaneurol.2023.2536

**eMethods.** Institutions where the work was performed, comparison to the study protocol, and acknowledgement and study organization

**eTable 1.** Detailed description of the categories in the Glasgow Outcome Scale Extended (GOSE)

**eTable 2.** Occupational status at time of, and at 6-months after Out-of-hospital cardiac arrest

**eTable 3.** Results of individual items of the Montreal Cognitive Assessment (MoCA)

**eFigure 1.** Functional outcome focusing on societal all participants including death

**eFigure 2.** Functional outcome focusing on societal participation by age groups

**eFigure 3.** Functional outcome focusing on societal participation by sex

This supplemental material has been provided by the authors to give readers additional information about their work.

## 1 **eMethods. Institutions where the work was performed**

2 **Australia:** Royal North Shore Hospital, Sydney; Concord Repatriation General Hospital, Sydney; The Alfred  
3 Hospital, Melbourne; Nepean Hospital, Sydney; Northern Hospital, Melbourne; Austin Hospital, Melbourne; St.  
4 Vincent's Hospital, Sydney; Princess Alexandra Hospital, Brisbane; John Hunter Hospital, Newcastle; Liverpool  
5 Hospital, Sydney. **Austria:** Medical University Innsbruck, Innsbruck. **Belgium:** Erasme University Hospital,  
6 Brussels; Ziekenhuis Oost-Limburg, Genk. **Czech Republic:** General University Hospital, Prague; University  
7 Hospital Hradec Králové, Hradec Králové; Regional Hospital Liberec, Liberec. **Denmark:** Aarhus University  
8 Hospital, Aarhus. **France:** Cochin University Hospital (APHP), Paris; Lariboisiere University Hospital (APHP),  
9 Paris; Centre Hospitalier deVersailles, Le Chesnay; CHU de Nantes, Nantes; Dupuytren Teaching Hospital,  
10 Limoges. **Germany:** Charité University Hospital, Berlin. **Italy:** San Martino Policlinico Hospital, Genoa; Civil  
11 Hospital, Baggiovara, Modena; Trieste University Hospital, Trieste. **New Zealand:** Wellington Regional Hospital,  
12 Wellington; Christchurch Hospital, Christchurch. **Norway:** Oslo University Hospital, Rikshospitalet, Oslo; St  
13 Olav's University Hospital, Trondheim; Sorlandet Hospital, Arendal; Haukeland University Hospital, Bergen.  
14 **Sweden:** Skåne University Hospital, Malmö; Skåne University Hospital, Lund; Helsingborg Hospital,  
15 Helsingborg; Södersjukhuset, Karolinska Institute, Stockholm; Capio Sankt Görän Hospital, Stockholm;  
16 Sahlgrenska University Hospital, Göteborg; Uppsala University Hospital, Uppsala; Linköping University  
17 Hospital, Linköping; Northern Älvsborg County Hospital, Trollhättan; Skaraborg Hospital, Skövde; Örebro  
18 University Hospital, Örebro; Halland hospital, Halmstad; Karlstad Central Hospital, Karlstad. **Switzerland:**  
19 Lausanne University Hospital, Lausanne; Bern University Hospital, Bern; Cardiocentro Ticino, Lugano; Cantonal  
20 Hospital St. Gallen, St Gallen; University Hospital Zurich, Zurich. **United Kingdom:** University Hospital of  
21 Wales, Cardiff; Royal Victoria Hospital, Belfast; Essex Cardiothoracic Centre, Basildon; Royal Berkshire  
22 Hospital, Reading; Manchester Royal Infirmary, Manchester; Bristol Royal Infirmary, Bristol; University Hospital  
23 Birmingham NHS foundation Trust, Birmingham; Queen Alexandra Hospital, Portsmouth; Royal Bournemouth  
24 Hospital, Bournemouth. **USA:** University of Pittsburgh, Pittsburgh; Mayo Clinic, Rochester.

25

## 26 **Comparison to the study protocol**

27 Minor modifications from the published protocol for outcome reporting and follow-up in the Targeted  
28 Hypothermia versus Targeted Normothermia after Out-of-hospital Cardiac Arrest trial (TTM2) were made:  
29 Firstly, we planned to use SDMT raw scores (0-110) from the Symbol Digit Modalities Test to assess mental  
30 processing speed/attention. As both oral and written versions of the test were used to a large extent in the trial,

1 and since the two versions have different normative values, it was considered more appropriate to use age and  
2 education adjusted z-scores for all analyses. Therefore, age and education were not included in the co-variate  
3 adjusted analysis, as adjustment was already included in the test score.  
4 According to protocol the first analyses of MoCA and SDMT include deceased in the non-parametric van  
5 Elteren test. However, as this test was not available in the R: language and environment for statistical computing,  
6 the stratified Wilcoxon Mann Whitney U test was used instead for these analyses.

## 8 **Acknowledgement and study organization**

### 9 **TTM2 collaborators:**

#### 10 STEERING GROUP

11 Niklas Nielsen, Lund University, Helsingborg Hospital, Department of Clinical Sciences Lund, Anesthesiology  
12 and Intensive care, Lund, Sweden (Chair and Chief Investigator); Jan Bělohávek, 2nd Department of Medicine,  
13 First Faculty of Medicine, Charles University in Prague and General University Hospital, Prague, Czech Republic  
14 (NI); Clifton Callaway, Department of Emergency Medicine, University of Pittsburgh, Pittsburgh, PA, USA (NI);  
15 Alain Cariou, Descartes University of Paris and Cochin University Hospital, Paris, France (NI); Tobias Cronberg,  
16 Lund University, Skåne University Hospital Lund, Department of Clinical Sciences, Neurology, Lund, Sweden  
17 (Senior Investigator); Josef Dankiewicz, Lund University, Skåne University Hospital Lund, Department of  
18 Clinical Sciences, Cardiology, Lund, Sweden (Coordinating Investigator); Glenn Eastwood, The Australian and  
19 New Zealand Intensive Care Research Centre, Monash University, Melbourne, Australia; David Erlinge, Lund  
20 University, Skåne University Hospital Lund, Department of Clinical Sciences, Cardiology, Lund, Sweden; Hans  
21 Friberg, Lund University, Skåne University Hospital Malmö, Department of Clinical Sciences, Anesthesia &  
22 Intensive care, Lund, Sweden (Senior Investigator); Jan Hovdenes, Department of Anesthesiology and Intensive  
23 Care, Oslo University Hospital, Rikshospitalet, Oslo, Norway (NI); Janus Christian Jakobsen, Copenhagen Trial  
24 Unit, Capital Region, Copenhagen, Denmark; Department of Regional Health Research, The Faculty of Health  
25 sciences, University of Southern Denmark, Denmark (Trialist); Michael Joannidis, Division of Intensive and  
26 Emergency Medicine, Department of Internal Medicine, Medical University Innsbruck, Innsbruck, Austria (NI);  
27 Hans Kirkegaard, Research Center for Emergency Medicine, Department of Clinical Medicine, Aarhus University  
28 Hospital and Aarhus University, Aarhus N, Denmark (NI); Helena Levin, Lund University, Skåne University  
29 Hospital Lund, Department of Clinical Sciences, Anesthesiology and Intensive care, Lund, Sweden (Clinical Trial  
30 Manager); Gisela Lilja, Lund University, Skåne University Hospital Lund, Department of Clinical Sciences,

1 Neurology, Lund, Sweden (Follow-up Coordinator); Matt P. G. Morgan, Adult Critical Care, University Hospital  
2 of Wales, Cardiff, United Kingdom; Alistair D. Nichol, University College Dublin- Clinical Research Centre at St  
3 Vincent's University Hospital, Dublin, Ireland. Per Nordberg, Department of Medicine, Center for Resuscitation  
4 Science, Karolinska Institute, Solna, Sweden; Mauro Oddo, Neuroscience Critical Care Group, Adult Intensive  
5 Care Medicine Service, CHUV-Lausanne University Hospital, University of Lausanne, Lausanne, Switzerland  
6 (NI); Paolo Pelosi, Anesthesiology and Critical Care, San Martino Policlinico Hospital, IRCCS for Oncology and  
7 Neurosciences, Department of Surgical Sciences and Integrated Diagnostics, University of Genoa, Genoa, Italy  
8 (NI); Christian Rylander, Department of Anesthesiology and Intensive Care Medicine, Institute of Clinical  
9 Sciences, Sahlgrenska Academy, University of Gothenburg, Gothenburg, Sweden (NI); Manoj Saxena, Division  
10 of Critical Care and Trauma, George Institute for Global Health. Bankstown-Lidcombe Hospital, South Western  
11 Sydney Local Health District, Sydney, Australia (NI); Christian Storm, Department of Nephrology and Medical  
12 Intensive Care, Charité - Universitätsmedizin Berlin, Germany (NI); Fabio S. Taccone, Department of Intensive  
13 Care, Erasme University Hospital, Université Libre de Bruxelles (ULB), Brussels, Belgium (NI); Susann Ullén,  
14 Clinical Studies Sweden – Forum South, Skåne University Hospital, Lund, Sweden (Chief Statistician); Matt P.  
15 Wise, Adult Critical Care, University Hospital of Wales, Cardiff, United Kingdom (NI); Paul J. Young, Medical  
16 Research Institute of New Zealand, Intensive Care Unit, Wellington Hospital, Wellington, New Zealand (NI).

17 NI- National Coordinating Investigator

#### 18 INDEPENDENT DATA MONITORING AND SAFETY COMMITTEE

19 Kathy Rowan, Intensive Care National Audit & Research Centre, UK (Chair); David Harrison, Intensive Care  
20 National Audit & Research Centre, UK; Paul Mouncey, Intensive Care National Audit & Research Centre, UK;  
21 Manu Shankar-Hari, Guy's and St Thomas's NHS Foundation Trust, London, UK; Duncan Young, Nuffield  
22 Department of Clinical Neurosciences, University of Oxford, UK.

#### 23 STATISTICIANS

24 Susann Ullén, Clinical Studies Sweden – Forum South, Skåne University Hospital, Lund, Sweden (Chief  
25 Statistician); Theis Lange, Department of Biostatistics, University of Copenhagen, Copenhagen, Denmark  
26 (Independent Statistician); Karolina Palmér, Department of Medical Statistics and Epidemiology, Region Skåne,  
27 Malmö, Sweden (Independent statistician).

#### 28 COORDINATING ORGANIZATIONS AND TRIAL MANAGEMENT

29 Region Skåne, Helsingborg Hospital, Helsingborg, Sweden (Sponsor)

30 Lund University, Lund, Sweden

1 **Core management group:** Niklas Nielsen (Chair and Chief Investigator), Josef Dankiewicz (Coordinating  
2 Investigator), Tobias Cronberg (Senior Investigator, Neurology), Hans Friberg (Senior Investigator, Intensive  
3 Care), Gisela Lilja (Follow-up Coordinator), Helena Levin  
4 (Clinical Trial Manager), Janus Christian Jakobsen (Trialist), Susann Ullén (Chief Statistician).  
5 Trial financial management: Helsingborg Hospital: Ulla-Britt Karlsson; Lund University: Simon Heissler.

6 **Australia:** The George Institute for Global Health, Sydney (Local Sponsor):  
7 Manoj Saxena, Frances Bass, Naomi Hammond, John Myburgh, Colman Taylor.

8 **France:** Clinical Research Unit, Paris Descartes Necker Cochin, Paris (Local Representative): Alain Cariou, Adele  
9 Bellino.

#### 10 TRIAL COORDINATORS AND MONITORS

11 **Australia:** The George Institute for Global Health, Sydney: Marwa Abel-all, Ben Finfer, Carolyn Koch, Yang Li,  
12 Anne O'Connor, Julia Pilowsky, Tina Schneider, Anna Tippett; Monash University, Melbourne: Bridget Ady,  
13 Tessa Broadley, Amanda Brown, Liz Melgaard, Mimi Morgan, Vanessa Singh, Rebecca Symons. **Austria:**  
14 Medical University, Innsbruck, Innsbruck: Kathrin Becker. **Belgium:** NVS Consulting, Brussels: Nathalie Van  
15 Sante. Czech Republic: Aixial, Brno: Vendula Saleova, Silvie Zerzanova. **Denmark:** Lund University, Lund,  
16 Sweden: Helena Levin. **France:** Clinical Research Unit, Paris Descartes Necker Cochin, Paris: Samia Sefir-Kribel.  
17 **Germany:** Charité Universitätsmedizin, Berlin: Ute Lübeck. Italy: Mario Negri Institute for Pharmacological  
18 Research, Milan: Martina Carrara. **New Zealand:** Medical Research Institute of New Zealand (MRINZ),  
19 Wellington: Kathryn Fernando, Diane Mackle, Leanlove Navarra, Judith Riley. **Norway:** Oslo University  
20 Hospital, Oslo: Elin Westerheim; Haukeland University Hospital, Bergen: Marianne Flatebø. **Sweden:**  
21 Helsingborg Hospital, Helsingborg: Ameldina Ceric, Zana Haxhija, Lovisa Terling; Skåne University Hospital,  
22 Lund: Lena Bossmar, Liz Jergle, Helén Holm Månsson. **Switzerland:** Lausanne University Hospital (CHUV),  
23 Lausanne: Samia Abed Maillard, Andreja Vujicic Zagar; Cantonal Hospital St. Gallen, St. Gallen: Christina  
24 Jodlauk. **United Kingdom:** University Hospital of Wales, Cardiff: Helen Hill; Niche Science & Technology,  
25 Richmond: Jennifer Scrivens; The HRB Irish Critical Care- Clinical Trials Network (ICC-CTN), Dublin, Ireland:  
26 Kate Ainscough, Ciara Fahey.

#### 27 SITES, PRINCIPAL INVESTIGATORS, AND SITE PERSONNEL

28 **Australia:** Austin Hospital, Melbourne: Rinaldo Bellomo (PI), Glenn Eastwood, Leah Peck, Helen Young;  
29 Concord Repatriation General Hospital, Sydney: Winston Cheung (PI), Rosalba Cross, Michael Hayes, Nitin Jain,  
30 Mark Kol, Asim Shah, Atul Wagh, Helen Wong; John Hunter Hospital, Newcastle: F. Eduardo Martinez (PI), Gail

1 Brinkerhoff, Dustin Bush; Liverpool Hospital, Sydney: Antony Stewart (PI), Anders Aneman, Lien Lombardo,  
2 Peter McCanny, James Penketh; Nepean Hospital, Sydney: Ian Seppelt (PI), Rebecca Gresham, Julie Lowrey,  
3 Kristy Masters, Christina Whitehead; Princess Alexandra Hospital, Brisbane: James Walsham (PI), Meg Harward,  
4 Josephine Mackay, Jason Meyer, Emma Saylor, Ellen Venz, Krista Wetzig; Royal North Shore Hospital, Sydney:  
5 Wade Stedman (PI), Angela Ashelford, Frances Bass, Naomi Hammond, Sharon Mar, Julia Pilowsky, Miyuki  
6 Tokumitsu, Elizabeth Yarad; St Vincent's Hospital, Sydney: Hergen Buscher (PI), Claire Reynolds; The Alfred  
7 Hospital, Melbourne: Andrew Udy (PI), Aidan Burrell, Jasmin Collins, Dashiell Gantner, Victoria Emma-Leah  
8 Martin, Phoebe Mccracken, Vinodh Nanjayya, Alistair Nichol, Alexander Sacha Richardson, Meredith Young;  
9 Northern Hospital, Melbourne: Angaj Ghosh (PI), Simone Said.

10 **Austria:** Medical University Innsbruck, Innsbruck: Michael Joannidis (PI), Ronny Beer, Frank Hartig, Raimund  
11 Helbok, Sebastian Klein, Andreas Peer.

12 **Belgium:** Erasme University Hospital, Brussels: Fabio S. Taccone (PI), Jacques Creteur, Dominique Durand;  
13 Ziekenhuis Oost-Limburg, Genk: Matthias Dupont (PI), Sigrid Christiaens, Carola Claes, Sebastiaan Deckx, Bert  
14 Ferdinande, Sanne Lenaerts, Wilifred Mullens, Sarah Stroobants, Evi Theunissen, David Verhaert.

15 **Czech Republic:** General University Hospital, Prague: Ondřej Šmíd (PI), Marek Flaksa, David Kemlink, Jan  
16 Malík, Michal Otáhal, Jan Rulišek, Michal Šíranec, Zdeněk Stach, Anna Valeriánová, Petra Zavadilova;  
17 University Hospital Hradec Králové, Hradec Králové: Miroslav Solař (PI), Róber Bánszky, Jana Červená, Renata  
18 Černá Pařízková, Libor Šimůnek, Filip Varhaník; Regional Hospital Liberec, Liberec: Jiří Karásek (PI), Matěj  
19 Strýček.

20 **Denmark:** Aarhus University Hospital, Aarhus: Anders Grejs (PI), Steffen Christensen, Peter Juhl-Olsen, Ida  
21 Katrine Thomsen, Lisa Gregersen Østergaard.

22 **France:** Cochin University Hospital (APHP), Paris: Alain Cariou (PI), Albert Cao, Pierre Dupland, Ariane  
23 Gavaud, Paul Jaubert, Mathieu Jozwiak, Nathalie Marin, Guillaume Savary; Lariboisiere University Hospital  
24 (APHP), Paris: Nicolas Deye (PI), Bruno Megarbane, Pierre Mora, Laetitia Sutterlin; Centre Hospitalier de  
25 Versailles, Le Chesnay: Stephane Legriel (PI), Hugo Bellut, Alexis Ferre, Guillaume Lacave, Marine Paul; CHU  
26 de Nantes, Nantes: Jean-Baptiste Lascarrou (PI), Emmanuel Canet, Charlotte Garret, Arnaud Felix Miaihle, Jean  
27 Reignier; Dupuytren Teaching Hospital, Limoges: Philippe Vignon (PI), Thomas Daix, Arnaud Desachy, Bruno  
28 Evrard, Bruno Francois, Anne-Laure Fedou, Marine Goudelin.

29 **Germany:** Charité Universitätsmedizin, Berlin: Christian Storm (PI), Gabriele Kress, Christoph Leithner, Jens  
30 Nee, Kaspar Josche Streitberger.

1 **Italy:** San Martino Policlinico Hospital, Genoa: Iole Brunetti (PI), Lorenzo Ball, Denise Battaglini, Giulia Bonatti,  
2 Iacopo Firpo, Paolo Frisoni, Arianna Iachi, Simona Maiani, Maura Mandelli, Chiara Robba, Fabio Tarantino; Civil  
3 Hospital, Baggiovara, Modena: Alberto Barbieri (PI), Elisabetta Bertellini, Enrico Giuliani, Gabriele Melegari;  
4 Trieste University hospital, Trieste: Erik Roman-Pognuz (PI), Giorgio Berlot, Umberto Lucangelo, Elisabetta  
5 Macchini.

6 **New Zealand:** Wellington Regional Hospital, Wellington: Paul Young (PI), Colin Barnes, Ben Barry, Nina  
7 Beehre, Dick Dinsdale, Sam Edney, Anna Hunt, Harriet Judd, Charlotte Latimer-Bell, Cassie Lawrence, James  
8 Moore, Shaanti Olatunji, Alex Psirides, Chelsea Robinson, Kate Tietjens, Jason Wright; Christchurch Hospital,  
9 Christchurch: David Knight (PI), Brandon Birker, David Bowie, Tara Burke, David Closey, Rosalind Crombie,  
10 Neil Davidson, Seton Henderson, Louise Hitchings, James McKay, Jan Mehrstens, Emmeline Minto, Stacey  
11 Morgan, Anna Morris, Jay Ritzemar-Carter, Jessica Roberts, Geoffrey Shaw, Katherine Townend, Kymbalee  
12 Vander Heyden.

13 **Norway:** Oslo University Hospital, Rikshospitalet, Oslo: Jan Hovdenes (PI), Vibeke Aune, Tomas Drægner, Simon  
14 Jacobsen, Søren Pieschke, Åse Rasmussen, Gro Ringstad Akselsen; St. Olav's University Hospital, Trondheim:  
15 Halvor Langeland (PI), Daniel Bergum, Therese M. Erbe, Pål Klepstad, Helle M. Næss; Sorlandet Hospital,  
16 Arendal: Roy Bjørkholt Olsen (PI), Lena Eriksen Skjelnes, Marius Holen, Joakim Iver Post; Haukeland University  
17 Hospital, Bergen: Rune Fanebust (PI), Linda Hårteig Sørensen, Ken Åge Kårstad, Carsten Fredrik Wickman.

18 **Sweden:** Sahlgrenska University Hospital, Gothenburg: Christian Rylander (PI), Marita Ahlqvist, Roman Desta  
19 Lindgren, Ingrid Eiving, Andreas Lundin, Patrik Martner, Elisabeth Myhrman, Birgitta Ryding; Skåne University  
20 Hospital, Malmö: Joachim Düring (PI), Mattias Bergström, Mattias Bohm, Ingrid Didriksson, Petrea Frid, Katarina  
21 Heimburg, Marina Larsson, Oscar Lundberg, Stefan Olsson Hau, Simon Schmidbauer; Skåne University Hospital,  
22 Lund: Ola Borgquist (PI), Anne Adolfsson, Anna Björnroos, Erik Blennow-Nordström, Irina Dragancea, Thomas  
23 Kander, Anna Lybeck, Gustav Mattiasson, Olof Persson, Malin Rundgren, Susann Schrey, Erik Westhall;  
24 Helsingborg Hospital, Helsingborg: Martin Annborn (PI), Sara Andertun, Florian Ebner, Nerida Gustavsson, Lisa  
25 Hassel, Jesper Johnsson, Marie Nelderup, Heléne Petersson, Jörgen Petersson, Frideriki Stafilidou; Hallands  
26 Hospital, Halmstad: Johan Undén (PI), Frida Antonsson, Git Bergman, Jörgen Gamroth, Maria Meirik, Katarina  
27 Rudolfsson, Helena Sandberg, Martin Thorsson; Karlstad Central Hospital, Karlstad: Kristin Savolainen (PI),  
28 Maria Hansbo, Malin Helliksson, Björne Nödtveidt, Johan Sanner, Victoria Sem, Camilla Sund Lindquist;  
29 Södersjukhuset, Karolinska Institute, Stockholm: Per Nordberg (PI), Akil Awad, Anna-Sofia Börjesson, Malin  
30 Hedberg, Mia Henning, Jacob Hollenberg; Northern Älvsborg County Hospital, Trollhättan: Per Petersen (PI),

1 Emelia Dahlberg, Johan Forshammar, Veronica Svensson; Capio S:t Görans Hospital, Stockholm: Michael  
2 Wanecek (PI), Håkan Eskilsson; Skaraborg Hospital, Skövde: Daniel Rodriguez-Santos (PI), Åsa Appelqvist,  
3 Henrietta Jidbratt, Elisabeth Johansson, Lars Kizakiewicz, Åsa Nilsson, Sinnika Olsson, Anders Paulsson,  
4 Urszula Stempel, Andreas Thoren; Örebro University Hospital, Örebro: Stefan Persson (PI), Ida Berglund, Eric  
5 Bergström, Cathrine Törnqvist, Ingela Östman; Uppsala University Hospital, Uppsala: Sten Rubertsson (PI), Ing-  
6 Marie Larsson, Elin Söderman, Ewa Wallin, Joanna Wessbergh; Linköping University Hospital, Linköping:  
7 Thomas Halliday (PI), Filippa Engvall.

8 **Switzerland:** Lausanne University Hospital (CHUV), Lausanne: Mauro Oddo (PI), Nawfel Ben-Hamouda,  
9 Adriano Bernini, Pierre-Nicolas Carron, Philippe Eckert, Eva Favre, John-Paul Miroz, Paola Morelli, Olivier  
10 Muller, Jan Novi, Andrea Rosseti, Madeleine Schnorf; Bern University Hospital, Bern: Matthias Haenggi (PI),  
11 Anja Levis, Sandra Nansoz, Marianne Roth & Team, Nicole Söll; Cantonal Hospital St. Gallen, St.Gallen: Claudia  
12 Schrag (PI), Mensur Alicajic, Philipp Baier, Joel Dütschler, Dominique Flügel, Edith Fässler, Ruth Gamio-Veis,  
13 Marc Güpfer, Yvonne Hilpertshauer, Stefan Hägele-Link, Gian-Reto Kleger, Peter Krähenmann, Maria  
14 Elisabeth Mair, Nadjia Schai, Christoph Strohmaier, Peter Tangl, Dominik Zieglgänsberger; University Hospital  
15 Zurich, Zurich: Marco Maggiorini (PI), Gabriele Claus, Gabi Consani-Vogel, Lukas Imbach, Samira Kaiser, Eva-  
16 Maria Kleinert, Pedro David Wendel Garcia; Cardiocentro Ticino, Lugano: Tiziano Cassina (PI), Pamela Agazzi,  
17 Bruno Capelli, Gabriele Casso, Martino Regazzi, Hervé Schlotterbeck, Gabriele Via, Michele Villa.

18 **United Kingdom:** University Hospital of Wales, Cardiff: Matt P. Wise (PI), Jenny Brooks, Eve Cocks, Jade Cole,  
19 Jacqueline Curtin, Michelle Davies, Rhys Davies, Stephen Fernandez, Julie Highfield, Helen Hill, Matt P. G.  
20 Morgan, Lydia Pennant, Sofia Rose, Emma Thomas, Angharad Williams; Royal Victoria Hospital, Belfast: Peter  
21 McGuigan (PI), Stephen Haffey, Aisling O'Neill, Kathryn Ward; Bristol Royal Infirmary, Bristol: Matthew  
22 Thomas (PI), Jeremy Bewley, Anna Chillingworth, Julie Cloake, Libby Cole, Hilary Galvin, Zoe Garland, Lisa  
23 Grimmer, Bethany Gumbrell, Lucy Howie, Rebekah Johnson, Chloe Searles, Agnieszka Skorko, Katie Sweet,  
24 Victoria Taylor, Denise Webster; Essex Cardiothoracic Centre, Basildon: Thomas Keeble (PI), Gill Adams, Rajesh  
25 K Aggarwal, Jo-Anne Cartwright, Steven Church, Gerald J Clesham, John R Davies, Kelly Farrell, Reto Gamma,  
26 Jane Harding, Rohan Jagathesan, Alamgir Kabir, Paul A Kelly, Lauren Kittridge, Maria Maccaroni, Gracie  
27 Maloney, Marco Mion, Naveen Nain, Raghunath Nalgirkar, Gyanesh Namjoshi, Stacey Pepper, Emily Redman,  
28 Nicholas M Robinson, Jeremy Sayer, Amanda Solesbury, Kare H Tang, Sali Urovi, Kunal Waghmare, Noel  
29 Watson, Teresa Webber; University Hospitals Birmingham NHS Foundation Trust, Birmingham: Peter Isherwood  
30 (PI), Conor Bentley, Colin Bergin, Ronald Carrera, Amy Clark, Lauren Cooper, Liesl Despy, Natalie Dooley,



1 Karen Ellis, Emma Fellows, Stephanie Goundry, Samantha Harkett, Christopher McGhee, Aoife Neal, Hazel  
2 Smith, Catherine Snelson, Elaine Spruce, Tony Whitehouse, Kamal Yakoub; Royal Berkshire Hospital, Reading;  
3 Andrew Walden (PI), Shauna Bartley, Parminder Bhuie, Matthew Frise, Nicola Jacques, Liza Keating; Queen  
4 Alexandra Hospital, Portsmouth; David Pogson (PI), Zoe Daly, Steve Rose; Manchester Royal Infirmary,  
5 Manchester; Jonathan Bannard-Smith (PI), Rachael Quayle; Royal Bournemouth Hospital, Bournemouth; Nigel  
6 Chee (PI), Nina Barratt, Katie Bowman, Debbie Branney, Elizabeth Howe, Maria Letts, Sally Pitts, Luke  
7 Vamplew.

8 **USA:** University of Pittsburgh, Pittsburgh PA: Clifton W. Callaway (PI), Sara Difiore Sprouse, Ankur A. Doshi;  
9 Mayo Clinic, Rochester MN: Jennifer Fugate (PI), Amy M. Headlee, Eelco F.M. Wijdicks.

10 PI – Principal Investigator

#### 11 RELATED ORGANIZATIONS

12 Copenhagen Trial Unit, Copenhagen, Denmark; Clinical Studies Sweden – Forum South, Skåne University  
13 Hospital, Lund, Sweden; The George Institute for Global Health, Sydney, Australia; Australian and New Zealand  
14 Intensive Care Research Centre, Monash University, Melbourne, Australia; Medical Research Institute of New  
15 Zealand - (MRINZ), Wellington, New Zealand; Clinical Research Unit, Paris Descartes Necker Cochin, Paris,  
16 France; Scandinavian Critical Care Trials Group (SCCTG); The HRB Irish Critical Care- Clinical Trials Network  
17 (ICC-CTN); The ANZICS Clinical Trials Group (CTG); Spiral Software, Wellington, New Zealand; Allianz  
18 Global Corporate & Specialty SE, Copenhagen, Denmark; IBBL (Integrated BioBank of Luxembourg),  
19 Dudelange, Luxembourg. We also would like to acknowledge the CENTER-TBI project supported by the  
20 Framework 7 programme of the European Union (602150-2) for the possibility to use the translated version of the  
21 structured GOSE interview. The translations formed part of a deliverable for the Outcomes Work Package, and  
22 were the responsibility of a team at the Institute of Medical Psychology and Medical Sociology, Göttingen Medical  
23 Center (Prof. Dr. N.v.Steinbüchel, Göttingen team and external and Center-TBI collaborators). The GOSE  
24 interviews were further modified for Cardiac Arrest use by the TTM2 national investigators after approval  
25 from Prof. Lindsay Wilson.

26

27

1  
2  
3

**eTable 1. Detailed description of the categories in the Glasgow Outcome Scale Extended (GOSE)**

|               | <b>Category</b>                  | <b>Description</b>                                            | <b>Question/s and answer/s indicating category in the GOSE interview</b>                                                                                                                                                                                                                                                                                                                                                                                                                                                                                      |
|---------------|----------------------------------|---------------------------------------------------------------|---------------------------------------------------------------------------------------------------------------------------------------------------------------------------------------------------------------------------------------------------------------------------------------------------------------------------------------------------------------------------------------------------------------------------------------------------------------------------------------------------------------------------------------------------------------|
| <b>GOSE 1</b> | <i>Dead</i>                      | NA                                                            | NA                                                                                                                                                                                                                                                                                                                                                                                                                                                                                                                                                            |
| <b>GOSE 2</b> | <i>Vegetative state</i>          | Unconscious                                                   | <ul style="list-style-type: none"> <li>Is the person able to obey simple commands, or say any words?=No. <i>Confirmation of vegetative state requires full assessment as in the Royal College of Physician Guidelines.</i></li> </ul>                                                                                                                                                                                                                                                                                                                         |
| <b>GOSE 3</b> | <i>Lower severe disability</i>   | Dependent, need frequent help                                 | <ul style="list-style-type: none"> <li>Is the assistance of another person at home essential every day for some activities of daily living?=Yes; AND, Do they need frequent help or someone to be around most of the time?=Yes</li> </ul>                                                                                                                                                                                                                                                                                                                     |
| <b>GOSE 4</b> | <i>Upper severe disability</i>   | Dependent, need some help                                     | <ul style="list-style-type: none"> <li>Is the assistance of another person at home essential every day for some activities of daily living?=Yes; AND, Do they need frequent help or someone to be around most of the time?=No</li> <li>OR/AND, Are they able to shop without assistance?=No</li> <li>OR/AND, Are they able to travel locally without assistance?=No</li> </ul>                                                                                                                                                                                |
| <b>GOSE 5</b> | <i>Lower moderate disability</i> | Independent, unable to participate in one or more life roles  | <ul style="list-style-type: none"> <li>Are they currently able to work to their previous capacity?=No; AND, able to work only in a sheltered workshop or non-competitive job, or currently unable to work</li> <li>OR/AND, Are they able to resume regular social and leisure activities outside home?=No; AND unable to participate: rarely, if ever, take part</li> <li>OR/AND, Have there been psychological problems which have resulted in ongoing family disruption or disruption to friendships?=Yes; AND, constant – daily and intolerable</li> </ul> |
| <b>GOSE 6</b> | <i>Upper moderate disability</i> | Independent, limited to participate in one or more life roles | <ul style="list-style-type: none"> <li>Are they currently able to work to their previous capacity?=No; AND reduced working capacity</li> <li>OR/AND, Are they able to resume regular social and leisure activities outside home?=No; AND participate much less: less than half as often</li> <li>OR/AND, Have there been psychological problems which have resulted in ongoing family disruption or disruption to friendships?=Yes; AND frequent – once a week or more, but tolerable</li> </ul>                                                              |
| <b>GOSE 7</b> | <i>Lower good recovery</i>       | Independent, returned to normal life with some symptoms       | <ul style="list-style-type: none"> <li>Are they able to resume regular social and leisure activities outside home?=No; AND participate a bit less: at least half as often as before cardiac arrest</li> <li>OR/AND, Have there been psychological problems which have resulted in ongoing family disruption or disruption to friendships?=Yes; AND occasional –less than weekly</li> <li>OR/AND, Are there any other current problems relating to the cardiac arrest which affect daily life?=Yes</li> </ul>                                                  |
| <b>GOSE 8</b> | <i>Upper good recovery</i>       | Independent and a full return to normal life                  | <ul style="list-style-type: none"> <li>Are there any other current problems relating to the cardiac arrest which affect daily life?=No</li> </ul>                                                                                                                                                                                                                                                                                                                                                                                                             |

4  
5

1  
2

**eTable 2. Occupational status at time of, and at 6-months after Out-of-hospital cardiac arrest**

| Occupational status                              | Time-point  | All included |              | Pre-arrest workers only |              |
|--------------------------------------------------|-------------|--------------|--------------|-------------------------|--------------|
|                                                  |             | Hypothermia  | Normothermia | Hypothermia             | Normothermia |
| No.                                              |             | 415          | 407          | 232                     | 207          |
| Working full-time <sup>a</sup> , No. (%)         | Pre-arrest  | 192 (46)     | 175 (43)     | 192 (83)                | 175 (85)     |
|                                                  | At 180 days | 88 (21)      | 97 (24)      | 87 (37)                 | 95 (46)      |
| Working part-time <sup>b</sup> , No. (%)         | Pre-arrest  | 39 (9)       | 32 (8)       | 39 (17)                 | 32 (16)      |
|                                                  | At 180 days | 54 (13)      | 41 (10)      | 53 (23)                 | 40 (19)      |
| Unemployed, No. (%)                              | Pre-arrest  | 8 (2)        | 21 (5)       | NA                      | NA           |
|                                                  | At 180 days | 19 (5)       | 22 (5)       | 13 (6)                  | 6 (3)        |
| Retired due to age, No. (%)                      | Pre-arrest  | 140 (34)     | 141 (35)     | NA                      | NA           |
|                                                  | At 180 days | 149 (36)     | 143 (35)     | 9 (4)                   | 3 (1)        |
| Retired due to disability/health, No. (%)        | Pre-arrest  | 20 (5)       | 20 (5)       | NA                      | NA           |
|                                                  | At 180 days | 40 (10)      | 31 (8)       | 19 (8)                  | 8 (4)        |
| On sick leave, No. (%)                           | Pre-arrest  | 4 (1)        | 7 (2)        | n/a                     | n/a          |
|                                                  | At 180 days | 52 (12)      | 58 (14)      | 47 (20)                 | 48 (23)      |
| Other (e.g. student, housewife/husband), No. (%) | Pre-arrest  | 12 (3)       | 11 (3)       | n/a                     | n/a          |
|                                                  | At 180 days | 13 (3)       | 15 (4)       | 3 (1)                   | 7 (3)        |

<sup>a</sup> Full time work defined as ≥30 hours a week

<sup>b</sup> Part time work defined as <30 hours a week

3  
4  
5  
6  
7  
8  
9  
10  
11  
12  
13  
14  
15  
16  
17  
18  
19  
20  
21

1 **eTable 3. Results of individual items of the Montreal Cognitive Assessment (MoCA)**

2

| Cognitive domains     |                    | MoCA-30 <sup>a</sup>    |                             | MoCA                    |                             | T-MoCA                  |                             |
|-----------------------|--------------------|-------------------------|-----------------------------|-------------------------|-----------------------------|-------------------------|-----------------------------|
| No.                   |                    | 760                     |                             | 607                     |                             | 153                     |                             |
| MoCA item             | Maximum item score | Raw scores<br>Mean (SD) | Percent of<br>maximum score | Raw scores<br>Mean (SD) | Percent of<br>maximum score | Raw scores<br>Mean (SD) | Percent of<br>maximum score |
| Visuoexecutive        | 5 points           | 4.01 (1.26)             | 80%                         | 4.01 (1.26)             | 80%                         | n/a                     | n/a                         |
| Naming                | 3 points           | 2.88 (0.46)             | 96%                         | 2.88 (0.46)             | 96%                         | n/a                     | n/a                         |
| Attention-Digit span  | 2 points           | 1.75 (0.51)             | 88%                         | 1.75 (0.51)             | 88%                         | 1.76 (0.51)             | 88%                         |
| Attention- Letters    | 1 point            | 0.93 (0.26)             | 93%                         | 0.94 (0.25)             | 94%                         | 0.91 (0.29)             | 91%                         |
| Attention-Calculation | 3 points           | 2.66 (0.77)             | 89%                         | 2.69 (0.73)             | 90%                         | 2.56 (0.90)             | 85%                         |
| Repetition            | 2 points           | 1.62 (0.66)             | 81%                         | 1.64 (0.64)             | 82%                         | 1.54 (0.73)             | 77%                         |
| Verbal fluency        | 1 point            | 0.59 (0.49)             | <b>59%</b>                  | 0.57 (0.50)             | <b>57%</b>                  | 0.65 (0.48)             | <b>65%</b>                  |
| Abstraction           | 2 points           | 1.64 (0.62)             | 82%                         | 1.62 (0.63)             | 81%                         | 1.71 (0.58)             | 86%                         |
| Delayed recall        | 5 points           | 2.95 (1.72)             | <b>59%</b>                  | 2.88 (1.74)             | <b>58%</b>                  | 3.21 (1.60)             | <b>64%</b>                  |
| Orientation           | 6 points           | 5.67 (0.97)             | 94%                         | 5.70 (0.89)             | 95%                         | 5.52 (1.21)             | 92%                         |

3

4 The two items with the most participants having low scores (less percent of maximum) indicated with bold text.

5 <sup>a</sup>including converted T-MoCA

6 *Abbreviations:* MoCA=Montreal Cognitive Assessment; T-MoCA=Telephone version of the Montreal Cognitive Assessment

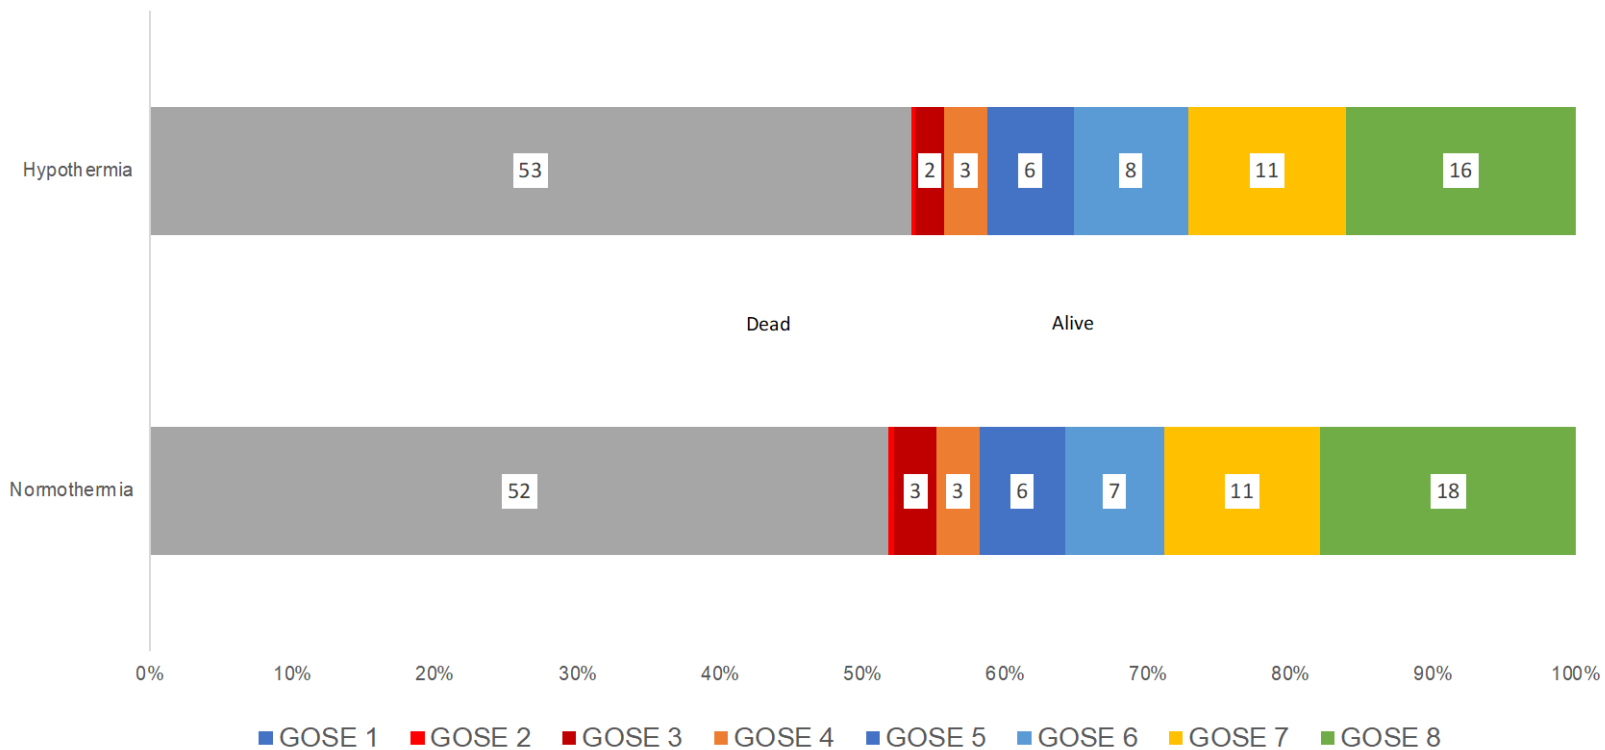

**eFigure 1: Functional outcome focusing on societal all participants including death**

The Glasgow Outcome Scale Extended (GOSE) for participants with hypothermia (n=880) and normothermia (n=865) at 6-months after out-of-hospital cardiac arrest. *Categories: GOSE 1 dead; GOSE 2 vegetative state (unconscious); GOSE 3 lower severe disability (dependent, need frequent help); GOSE 4 upper severe disability (dependent, need some help); GOSE 5 lower moderate disability (independent, unable to participate in one or more life roles), 6 upper moderate disability (independent, limited to participate in one or more life roles), 7 lower good recovery (independent, returned to normal life with some symptoms); and GOSE 8 upper good recovery (independent and a full return to normal life).*

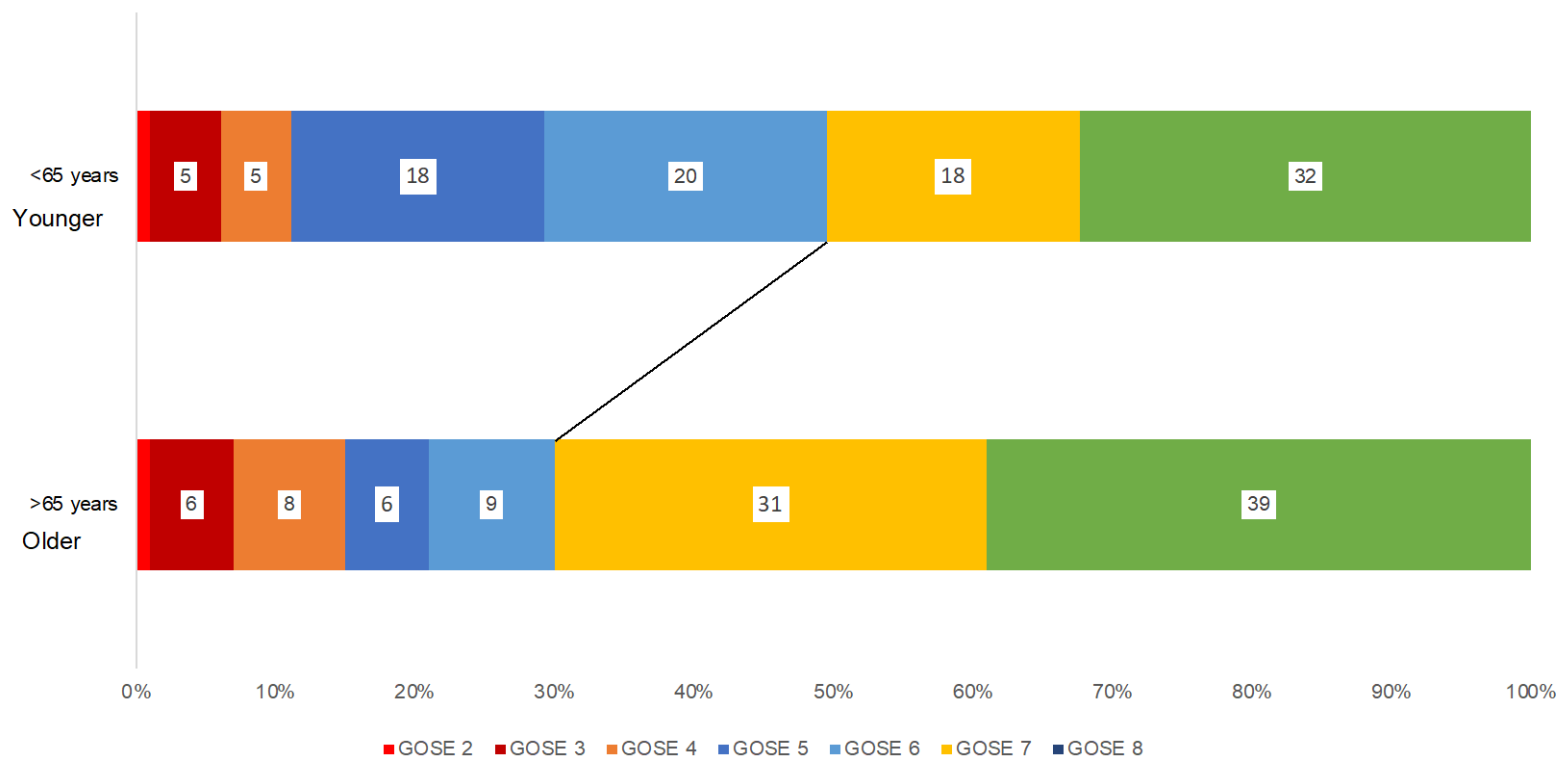

**eFigure 2: Functional outcome focusing on societal participation by age groups**

The Glasgow Outcome Scale Extended (GOSE) for younger (n=494) and older (n=340) survivors (n=834) at 6-months after out-of-hospital cardiac arrest. *Categories: GOSE 2 vegetative state* (unconscious); *GOSE 3 lower severe disability* (dependent, need frequent help); *GOSE 4 upper severe disability* (dependent, need some help); *GOSE 5 lower moderate disability* (independent, unable to participate in one or more life roles), *6 upper moderate disability* (independent, limited to participate in one or more life roles), *7 lower good recovery* (independent, returned to normal life with some symptoms); and *GOSE 8 upper good recovery* (independent and a full return to normal life).

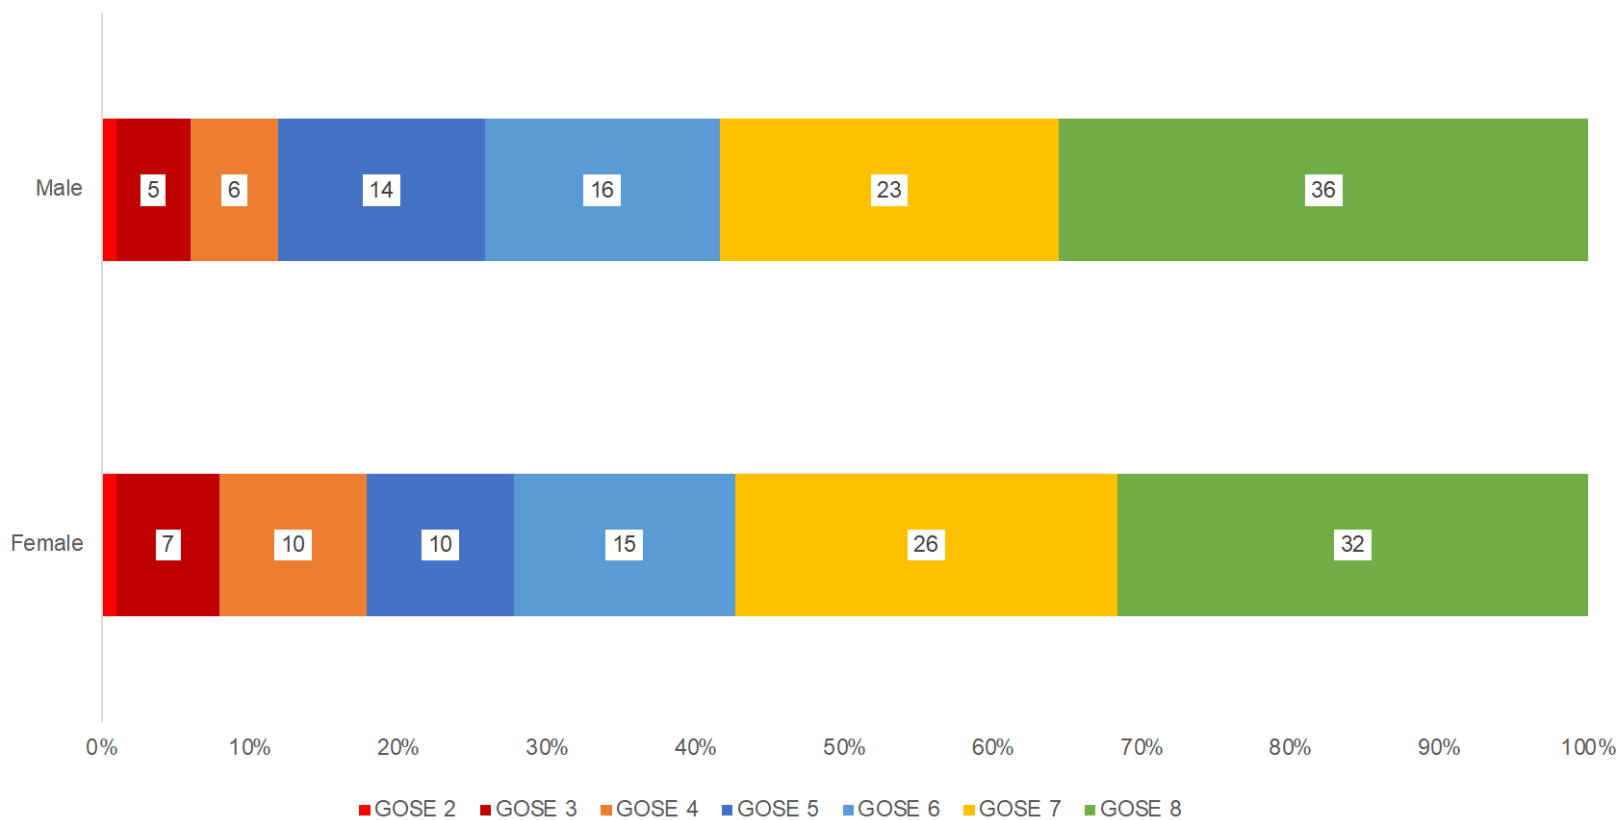

**eFigure 3: Functional outcome focusing on societal participation by sex**

The Glasgow Outcome Scale Extended (GOSE) for survivors (n=834) at 6-months after out-of-hospital cardiac arrest for males (n=698/834) and females (n=136/834). *Categories: GOSE 2 vegetative state (unconscious); GOSE 3 lower severe disability (dependent, need frequent help); GOSE 4 upper severe disability (dependent, need some help); GOSE 5 lower moderate disability (independent, unable to participate in one or more life roles), 6 upper moderate disability (independent, limited to participate in one or more life roles), 7 lower good recovery (independent, returned to normal life with some symptoms); and GOSE 8 upper good recovery (independent and a full return to normal life).*
