# Supplementary material for: Effects of Hypothermia vs Normothermia on Societal Participation and Cognitive Function at 6 Months in Survivors After Out-of-Hospital Cardiac Arrest: A Predefined Analysis of the TTM2 Randomized Clinical Trial
Source: PubMed Central journal article supplement (PMC10407762; doi:10.1001/jamaneurol.2023.2536), 2023-08-07
Supplement: jamaneurol-e232536-s003.pdf [file jamaneurol-e232536-s003.pdf]

## Data Sharing Statement

Lilja. The Effects of Hypothermia vs Normothermia on Societal Participation and Cognitive Function at 6 Months in Survivors After Out-of-Hospital Cardiac Arrest. *JAMA Neurol.* Published August 07, 2023. doi:10.1001/jamaneurol.2023.2536

### Data

**Data available:** Yes

**Data types:** Deidentified participant data, Data dictionary

**How to access data:** Data are available upon reasonable request to the corresponding author

**When available:** With publication

### Supporting Documents

**Document types:** Other (please specify)

**Additional Information:** Online supplemental material Pre published protocol for the TTM2 trial and TTM2 trial follow up are published

**How to access documents:** Published. References are included in the manuscript

**When available:** With publication

### Additional Information

**Who can access the data:** Protocols are published and available. References are available into the manuscript

**Types of analyses:** n/a

**Mechanisms of data availability:** n/a

**Any additional restrictions:** n/a
